# Supplementary material for: The Effect of Concentration, Temperature, and pH on the Formation of Hyaluronic Acid–Surfactant Nanohydrogels
Source: MDPI journal article supplement (doi:10.3390/gels9070529), 2023-06-29
Supplement: s1 [file s1]

Supplementary Materials:

# The Effect of Concentration, Temperature, and pH on the Formation of Hyaluronic Acid–Surfactant Nanohydrogels

László Seres <sup>1,2</sup>, Edit Csapó <sup>1,2</sup>, Norbert Varga <sup>2,\*</sup> and Ádám Juhász <sup>1,\*</sup>

<sup>1</sup> Interdisciplinary Excellence Center, Department of Physical Chemistry and Materials Science, University of Szeged, H-6720 Szeged, Hungary; sereslaci8@gmail.com (L.S.); juhaszne@chem.u-szeged.hu (E.C.)

<sup>2</sup> MTA-SZTE Lendület “Momentum” Noble Metal Nanostructures Research Group, University of Szeged, H-6720 Szeged, Hungary

\* Correspondence: vargano@chem.u-szeged.hu (N.V.); juhaszad@chem.u-szeged.hu (Á.J.); Tel.: +36-(62)-544-211 (N.V. & Á.J.)

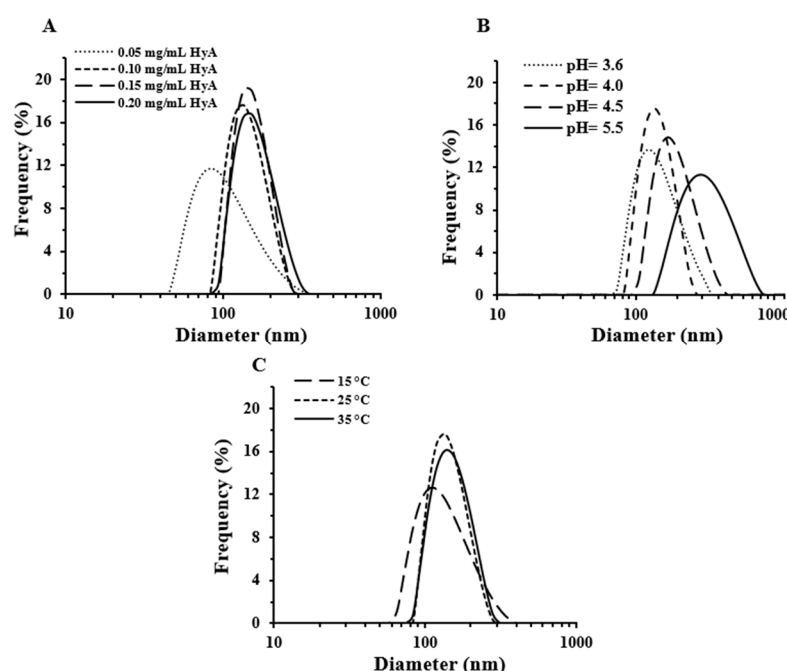

**Figure S1.** The differential distribution curves of HyA/CTAB particles ( $n_{\text{CTAB}}/n_{\text{HyA}}=0.76$ ) at (A) different HyA concentrations ( $C_{\text{HyA}} = 0.05 - 0.20$  mg/mL,  $T = 25^\circ\text{C}$ , high purified water medium) (B) different pH values ( $C_{\text{HyA}} = 0.1$  mg/mL,  $T = 25^\circ\text{C}$ ,  $\text{pH} = 3.6 - 5.5$  acetate buffer medium) and (C) different temperatures ( $C_{\text{HyA}} = 0.10$  mg/mL,  $T = 15-25^\circ\text{C}$ , high purified water medium).

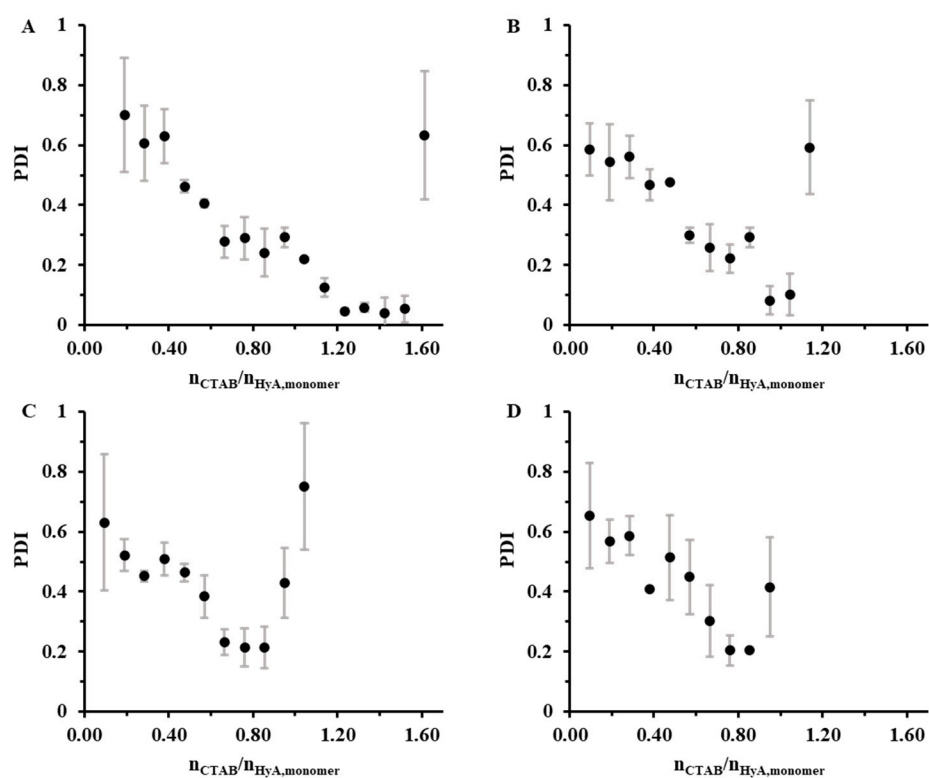

**Figure S2.** Polydispersity of the dispersion during titration of HyA with CTAB ( $c_{CTAB} = 25$  mM) at (A) 0.05 mg/mL, (B) 0.10 mg/mL, (C) 0.15 mg/mL and (D) 0.20 mg/mL polymer concentrations ( $V_{HyA} = 10$  mL;  $T = 25$  °C; high purified water medium).

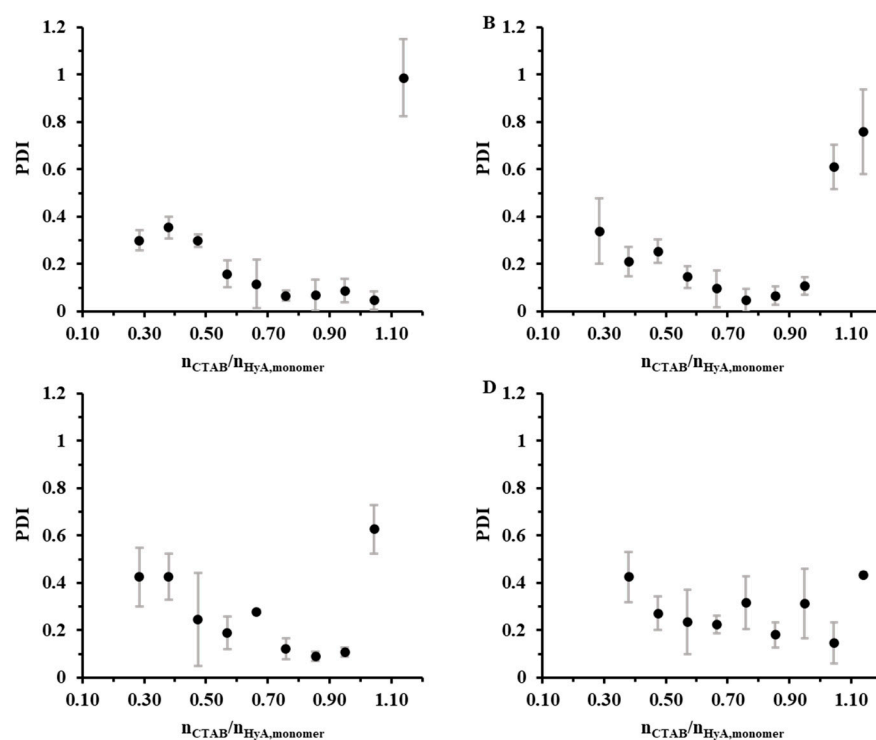

**Figure S3.** Polydispersity of the dispersion during titration of HyA with CTAB ( $c_{CTAB} = 25$  mM) in (A) pH=3.6, (B) pH=4.0, (C) pH=4.5 and (D) pH=5.5 acetate buffer media ( $c_{HyA} = 0.10$  mg/mL,  $V_{HyA} = 10$  mL;  $T = 25^{\circ}\text{C}$ ).

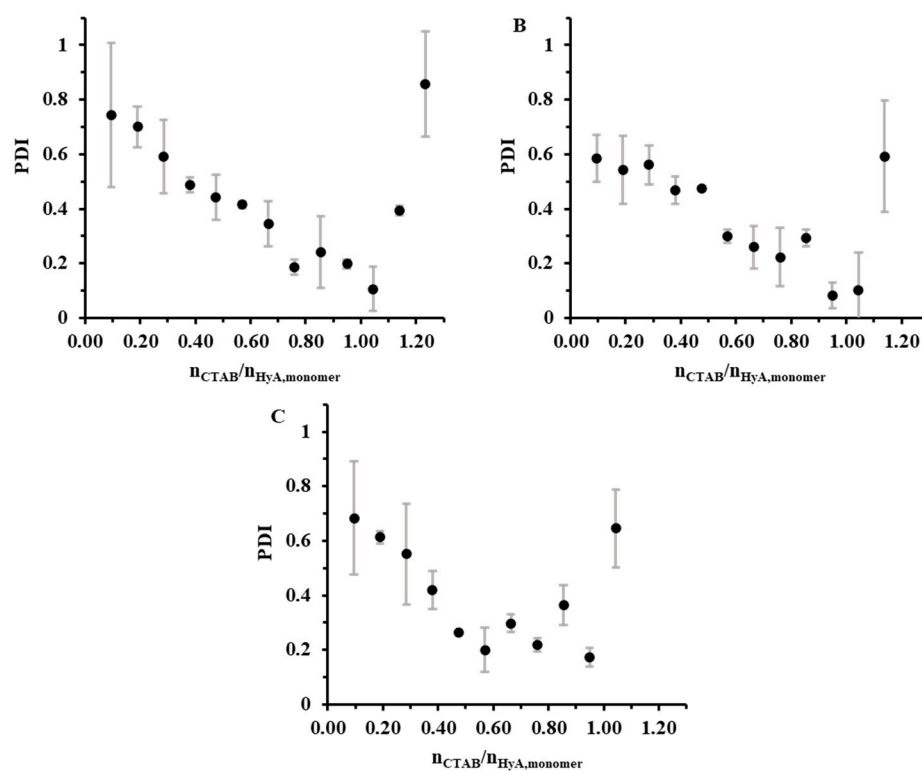

**Figure S4.** Polydispersity of the dispersion during titration of HyA with CTAB ( $c_{CTAB} = 25$  mM) at (A) 15°C, (B) 25°C and (C) 35°C temperatures ( $c_{HyA} = 0.10$  mg/mL,  $V_{HyA} = 10$  mL; high purified water medium).

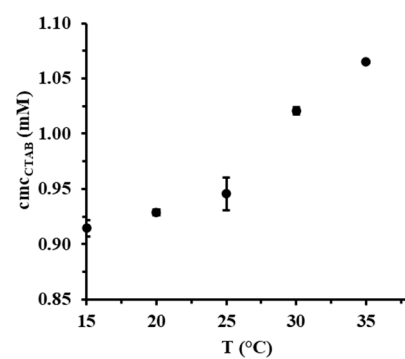

**Figure S5.** c.m.c. of the CTAB ( $c_{\text{CTAB}} = 25 \text{ mM}$ ) at different temperatures ( $c_{\text{HyA}} = 0.10 \text{ mg/mL}$ ,  $T = 15 - 35 \text{ }^{\circ}\text{C}$ , high purified water medium).

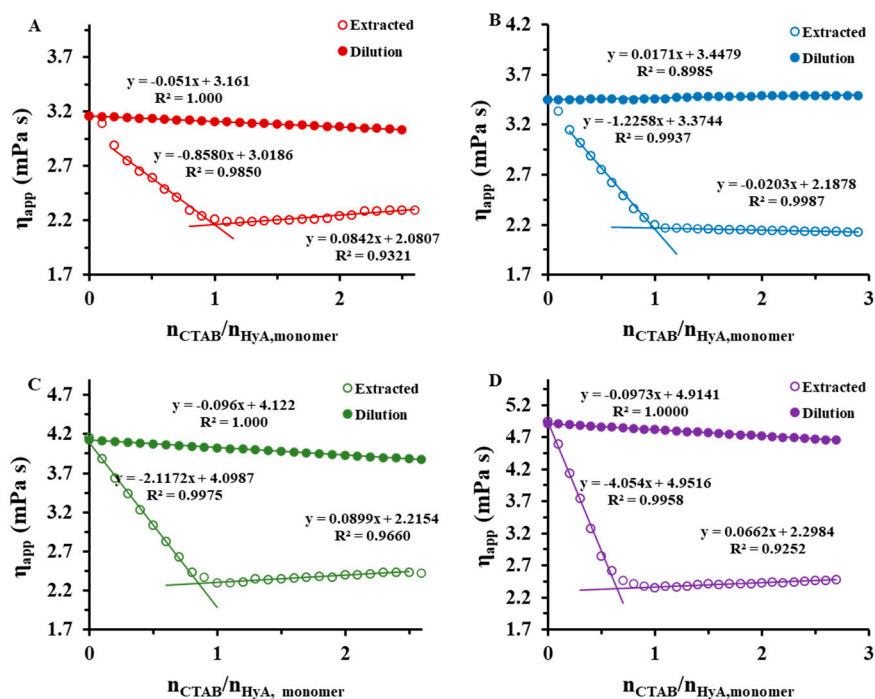

**Figure S6.** The apparent viscosity curves of the HyA at (A) 0.05 mg/mL, (B) 0.10 mg/mL, (C) 0.15 mg/mL and (D) 0.20 mg/mL (Filled markers: dilution; empty markers: uncorrected and CTAB-titrated HyA solution) ( $V_{HyA} = 19$  mL,  $C_{CTAB} = 25$  mM, high purified water medium).

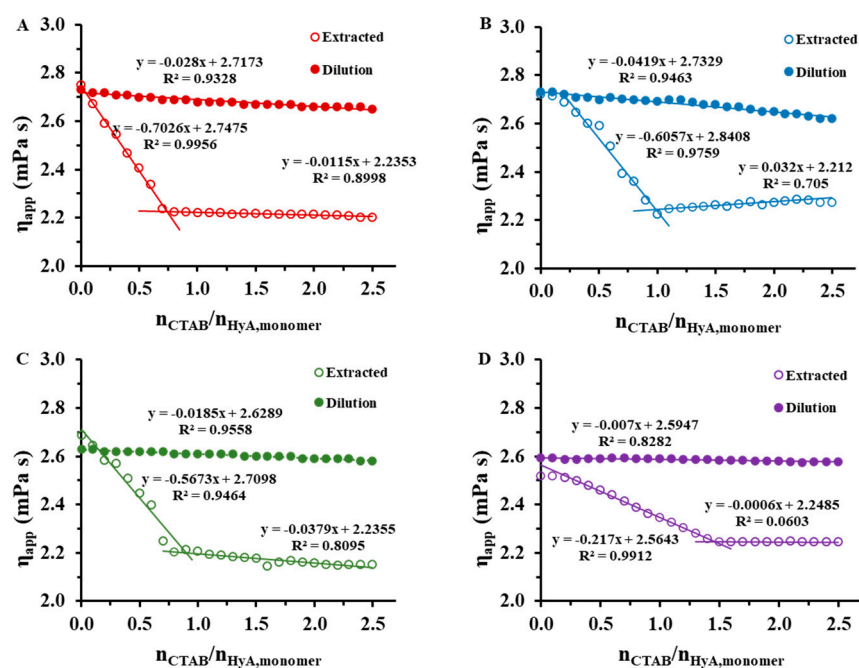

**Figure S7.** The apparent viscosity curves of the HyA at (A) pH=3.6, (B) pH=4.0, (C) pH=4.5 and (D) pH=5.5 acetate buffer (Filled markers: dilution; empty markers: uncorrected and CTAB-titrated HyA solution) ( $c_{HyA} = 0.10$  mg/mL;  $V_{HyA} = 19$  mL;  $c_{CTAB} = 25$  mM).

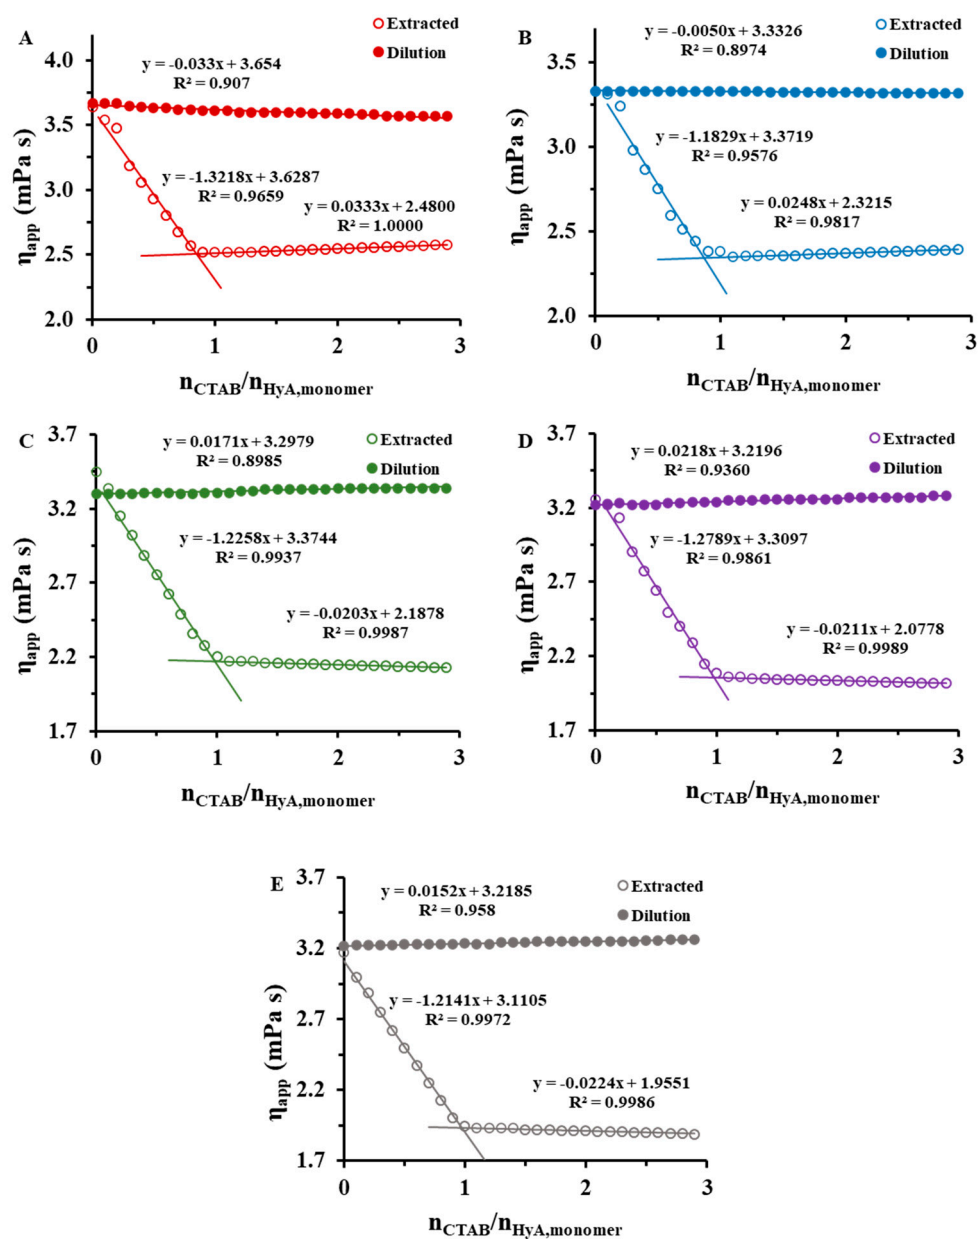

**Figure S8.** The apparent viscosity curves of the HyA at (A) 15°C, (B) 20°C, (C) 25°C, (D) 30°C and (E) 35°C (Filled markers: dilution; empty markers: uncorrected and CTAB-titrated HyA solution) ( $c_{HyA} = 0.10$  mg/mL,  $V_{HyA} = 19$  mL;  $c_{CTAB} = 25$  mM, high purified water medium).



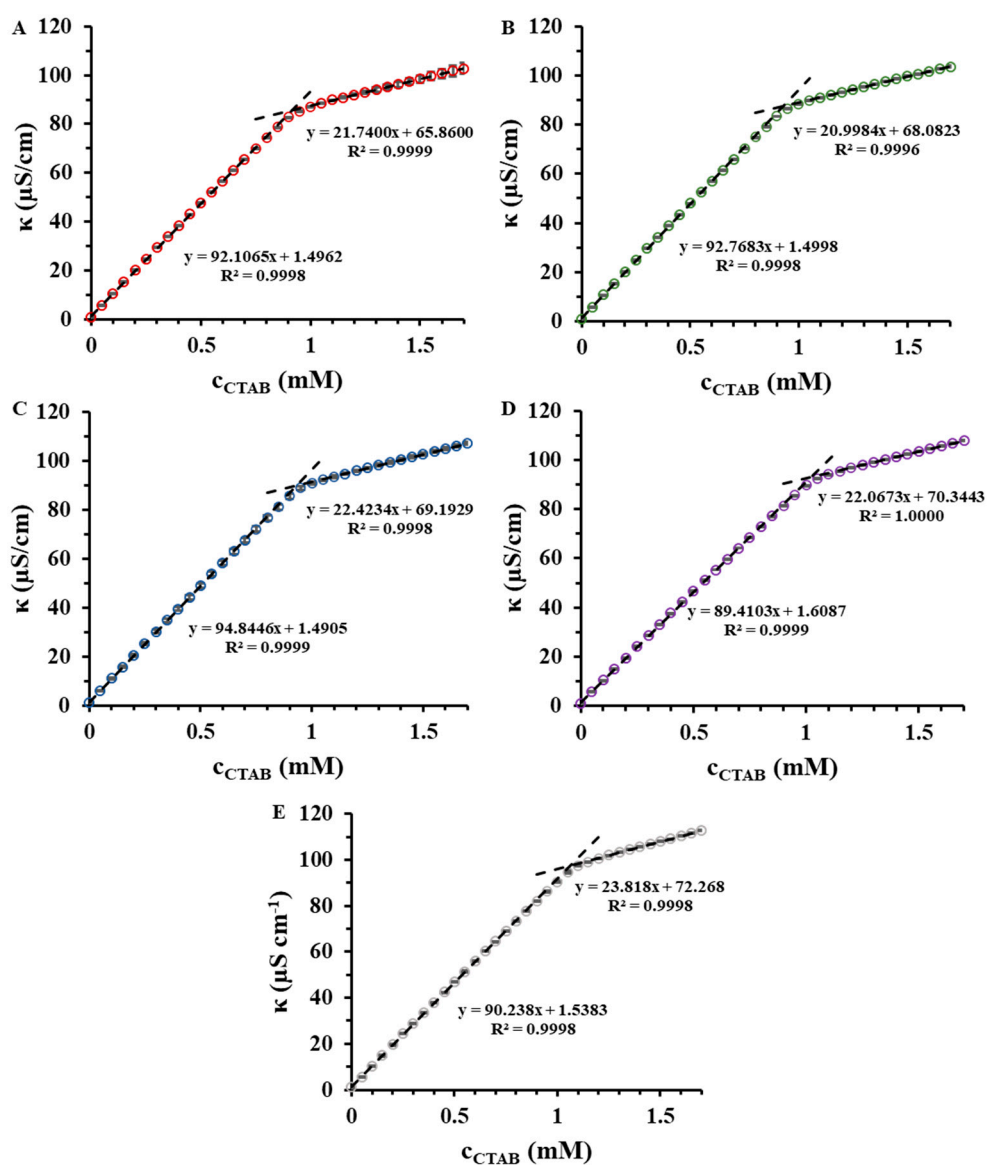

**Figure S9.** The conductometric titration of high purified water with CTAB (25 mM) at (A) 15°C, (B) 20°C, (C) 25°C, (D) 30°C and (E) 35°C temperature.
